# Supplementary material for: LacR and TrxB are key virulence factors involved in pneumococcal meningitis as identified by a genome-wide association study
Source: Research Square preprint supplement (doi:10.21203/rs.3.rs-6771075/v1), 2025-06-27
Supplement: Supplementary file 1 [file efab1de822df9dfd922a2253.xlsx]

## Sheet: Primers
Table S5. Primers
Oligonucleotide name	Sequence (5' to 3')	Description
SPV0115_LF_FW	ATGTTAAAAAAATATCCTTGTACGATGCAACATGAC	Construction of SPV_0115::eryr
SPV0115_LF_RV	TTTTTCTAGATTAGCCATAAGTAACCTCCTCTGTATCTAAC	Construction of SPV_0115::eryr
SPV0115_RF_FW	TTTTGGATCCGAAAGATATCTTATCTAGGTAACTAAGTGC	Construction of SPV_0115::eryr
SPV0115_RF_RV	AAGCGAAGGAAAGATAAAAAAGCCGAG	Construction of SPV_0115::eryr
P32-eryR_XbaI_FW	TTTTCTAGAATTATTTCCTCCCGTTAAATAATAGATAACTATTAAAAA	Construction of knockout mutants
P32-eryR_BamHI_RV	TTTTGGATCCGGATTTTTGTGAGCTTGGACTAGAAAAAAACT	Construction of knockout mutants
SPV0239_LF_FW	ATGAGTTTTTATAATCATAAAGAAATTGAGCCTAAGTGGC	Construction of SPV_0239::eryr
SPV0239_LF_RV	TTTTTCTAGAAGCTTTCTCCTTTTTTCACTTTTCAAACT	Construction of SPV_0239::eryr
SPV0239_RF_FW	TTTTGGATCCGAGGTGTTGAGATGATTACTATTAAAAAG	Construction of SPV_0239::eryr
SPV0239_RF_RV	CTTTTTATTATCCCATAGTTCACGAATTTTGTCAAAGG	Construction of SPV_0239::eryr
SPV0652_LF_FW	ATGATTCCTGTAGTTATTGAACAAACAAGCC	Construction of SPV_0652::eryr
SPV0652_LF_RV	TTTTTCTAGAGTTAAGAATATACCGAATTATCAGAAAATTGTCAATGT	Construction of SPV_0652::eryr
SPV0652_RF_FW	TTTTGGATCCTTTAATACTCTTCGAAAATCTCTTCAAACTG	Construction of SPV_0652::eryr
SPV0652_RF_RV	TTACACCTTCTCTTTCACATTCTTACCAAGG	Construction of SPV_0652::eryr
SPV0883_LF_FW	ATGAAACCTGAAAAACCTAAAAAATTGGGTCT	Construction of SPV_0883::eryr
SPV0883_LF_RV	TTTTTCTAGATGTGTACTATTTTTGGTTCATTTTACTATATTTTATAAGT	Construction of SPV_0883::eryr
SPV0883_RF_FW	TTTTGGATCCAACATGATTTATGAAATGTCAGACCT	Construction of SPV_0883::eryr
SPV0883_RF_RV	TTATTCAAAAATTCCAGCTAGAACATTTACTTGTCCT	Construction of SPV_0883::eryr
SPV0897_LF_FW	AAAAATCCCAGTCGCTAGACTAGGG	Construction of SPV_0897::eryr
SPV0897_LF_RV	TTTTTCTAGAAAGAAGATAAGCTAGGTAGTTCTTACCTGG	Construction of SPV_0897::eryr
SPV0897_RF_FW	TTTTGGATCCTTACTCTTTGGGTAACTTGCC	Construction of SPV_0897::eryr
SPV0897_RF_RV	GATAAAAACATCACAAGGAAGCAGTCATGAAAAA	Construction of SPV_0897::eryr
SPV1018_LF_FW	TTAACTTTCTTTTTTACCTAAAACCAGTGATTTAACGG	Construction of SPV_1018::eryr
SPV1018_LF_RV	TTTTTCTAGATATATAGGGTAAAAGATAGGCTAAAAGATAGGGTAAAAGG	Construction of SPV_1018::eryr
SPV1018_RF_FW	TTTTGGATCCACCTTAATTATACTCTTAATTTACAAAAAAGTCTTAAAATTGAG	Construction of SPV_1018::eryr
SPV1018_RF_RV	ATGACACTTCCAGTTAGAAAATCCCTGC	Construction of SPV_1018::eryr
P32-eryR_HindIII_RV	TTTTAAGCTTGGATTTTTGTGAGCTTGGAC	Construction of knockout mutants
SPV1062_LF_FW	TTATTCTTCATCCATACTCAAGACGCTGAG	Construction of SPV_1062::eryr
SPV1062_LF_RV	TTTTACTAGTTACTCCTAGCAGGGTATGGT	Construction of SPV_1062::eryr
SPV1062_RF_FW	TTTTGGATCCTTATTCATTTTTAAATTGACTATGCGCC	Construction of SPV_1062::eryr
SPV1062_RF_RV	CTCTGGAAGATGCGATTACTGCC	Construction of SPV_1062::eryr
P32-eryR_SpeI_FW	TTTTACTAGTTTATTTCCTCCCGTTAAATAATAGATAACTATTAAAAATAGAC	Construction of knockout mutants
SPV2022_LF_FW	CTCTCTCCCTTTCTACTACCAGAACTCC	Construction of SPV_2022::eryr
SPV2022_LF_RV	TTTTTCTAGAAAGAATAAAAGTATCAGCATCTGACCATAAGTC	Construction of SPV_2022::eryr
SPV2022_RF_FW	TTTTGGATCCTTGACTATTATACCGAAATTTTCTCATTTTTAAAAGAA	Construction of SPV_2022::eryr
SPV2022_RF_RV	ATGACAGAAATTAGACTAGAGCACGTCAG	Construction of SPV_2022::eryr
SPV0492_LF_FW	ATGAGTTACGAACAAGAATTTATGAAGGAATTTGAAG	Construction of SPV_0492::eryr
SPV0492_LF_RV	TTTTTCTAGAGGCTCTATTGTAGCAAGTTTTTCTCG	Construction of SPV_0492::eryr
SPV0492_RF_FW	TTTTGGATCCGATGAGCGATGTAAAAGAGG	Construction of SPV_0492::eryr
SPV0492_RF_RV	TTAATTACTTTTATTGACAATTTTAACCAAACCAATTTTTGAAAGTT	Construction of SPV_0492::eryr
SPV1013_LF_FW	CTCAGCCTCGTTGGAATTTTTCATCAC	Construction of SPV_1013::eryr
SPV1013_LF_RV	TTTTGCTAGCAAGAAGATTATACCACATTGTGTACT	Construction of SPV_1013::eryr
SPV1013_RF_FW	TTTTGGATCCTTATTTTTTAAGGTTGTAGAATGATTTCAATCCAC	Construction of SPV_1013::eryr
SPV1013_RF_RV	ATGTCAATTATTACTGATGTTTACGCTCGC	Construction of SPV_1013::eryr
SPV1044_LF_FW	ATGGAAACTTACTACAAAGCCATTAACTGGAA	Construction of SPV_1044::eryr
SPV1044_LF_RV	TTTTTCTAGATAGTCTAAACCGTAGTTATAGTCATCGTCTTG	Construction of SPV_1044::eryr
SPV1044_RF_FW	TTTTGGATCCTAAACTGAAAGAGCCTGGG	Construction of SPV_1044::eryr
SPV1044_RF_RV	TAGAATTAGTCATTAGATATAGAATTTTAGTGAGTCCAAAAGATGT	Construction of SPV_1044::eryr
SPV1060_LF_FW	TTAAGCGATTGCTTCATCTATATAAGCATAAAGTTTTTCT	Construction of SPV_1060::eryr
SPV1060_LF_RV	TTTTTCTAGATAGTTTTTATACTCTTCGAAAATCTCTTCAAACCAC	Construction of SPV_1060::eryr
SPV1060_RF_FW	TTTTGGATCCCTATTTATTATAAATTGTTTTTGATATTTTGACAAGACCA	Construction of SPV_1060::eryr
SPV1060_RF_RV	ATGACAGATTATTATGTAATTGGAGATGTTCACGG	Construction of SPV_1060::eryr
SPV1344_LF_FW	TTCTGTGCCTTTCTTGTGTTTGTGG	Construction of SPV_1344::eryr
SPV1344_LF_RV	TTTTTCTAGAATGTATAGTGCATTGAAGTTAAAATAGTACACTTTGAT	Construction of SPV_1344::eryr
SPV1344_RF_FW	TTTTGGATCCCCTCCCCACTCCT	Construction of SPV_1344::eryr
SPV1344_RF_RV	ACAAACTAAAATTATGTGATACTTCACATAATTTTCTTTAGAAA	Construction of SPV_1344::eryr
SPV1373_LF_FW	TTATGGTTTGATACGGTGCAACATACG	Construction of SPV_1373::eryr
SPV1373_LF_RV	TTTTTCTAGAAAAAGAAAAGGAAAAATAATGACAAAACGTGTAACG	Construction of SPV_1373::eryr
SPV1373_RF_FW	TTTTGGATCCTCATAGGCCCTCCTTATTGAC	Construction of SPV_1373::eryr
SPV1373_RF_RV	GTGACTGAAAAAGTAAGAACTGTTTCACTTTCAAA	Construction of SPV_1373::eryr
SPV1393_LF_FW	CTATTTTTTTTCATGTTTCCATCCTCCTAGCAAT	Construction of SPV_1393::eryr
SPV1393_LF_RV	TTTTTCTAGAAGTTTCTCCTTTGTTTTTTCTAGTCAGTTTATTTTATCA	Construction of SPV_1393::eryr
SPV1393_RF_FW	TTTTGGATCCAAAAGAACCACGAGTCACA	Construction of SPV_1393::eryr
SPV1393_RF_RV	ATGAGTTTCACAGTAGCAGTAAAAGAAGAAATCC	Construction of SPV_1393::eryr
SPV0115_cPCR_FW	ACGGTTGAAAATAAATTAATTCAAGAACTACTGGG	Colony PCR SPV_0115::eryr
SPV0239_cPCR_FW	TCAAAATTAATGAGATACAGTATACAGTTTTTTCTTTAAACACATTTCA	Colony PCR SPV_0239::eryr
SPV0652_cPCR_FW	GAAAGCAGAGCAAAAATTTGACCTTTTTTGAC	Colony PCR SPV_0652::eryr
SPV0883_cPCR_FW	AGTCGGATCAAGCTAGGGAATTGT	Colony PCR SPV_0883::eryr
SPV0897_cPCR_FW	TAAATAACCTCTTTCGGAATTTTCTAAAAATTTCTATAATAGAAG	Colony PCR SPV_0897::eryr
SPV1018_cPCR_FW	TTCCTCGACCAACTTGGGATAGTATAGT	Colony PCR SPV_1018::eryr
SPV1062_cPCR_FW	TCGAAGAGTATAAAAACTAAAAAAGCAGACCATCT	Colony PCR SPV_1062::eryr
SPV2022_cPCR_FW	GTCCATCCTTAGCCATAATGACATGATAACC	Colony PCR SPV_2022::eryr
SPV0492_cPCR_FW	AGACGGAGAATTCCAAGGAGTGTT	Colony PCR SPV_0492::eryr
SPV1013_cPCR_FW	CAATGTAGAAGACCCGCTTGCC	Colony PCR SPV_1013::eryr
SPV1044_cPCR_FW	AAAGTCGGGCTTCCGACTTTTTG	Colony PCR SPV_1044::eryr
SPV1060_cPCR_FW	AGCACTTTTAATTTGGTGACTTGAGTTAACAC	Colony PCR SPV_1060::eryr
SPV1344_cPCR_FW	CAATTTCTCTATTTGATTTCCCTTCTTTTTTCCATCT	Colony PCR SPV_1344::eryr
SPV1373_cPCR_FW	TGAGGTTCGCTCACAATAAACTATTATACTAGAAAAAAT	Colony PCR SPV_1373::eryr
SPV1393_cPCR_FW	CGTTTTTACCTGCCTAGCACTGG	Colony PCR SPV_1393::eryr
Standard_cPCR_RV	GAAACACGCCAAAGTAAACAATTTAAGTACCA	Colony PCR knockout mutants
comp_ISU_FW	GCCAATAAATTGCTTCCTTGTTTTG	Construction of complementation mutants
C_SPV_1044_ISU_RV	AGCGTCACGTCTCCCATTATTTTTCCTCCTTATTTATTTAGA	Construction of SPV_1044::eryr complemented
C_SPV_1044_FW	AGCGTCACGTCTCGAATGCTCAAACAAGAAAAATTA	Construction of SPV_1044::eryr complemented
C_SPV_1044_RV	AGCGTCACGTCTCGGCTTAAGGCTTGATGACTTTAAT	Construction of SPV_1044::eryr complemented
C_SPV_1044_ISD_FW	AGCGTCACGTCTCCAAGCCGGATCCCTCCAGTAAC	Construction of SPV_1044::eryr complemented
comp_ISD_RV	ATGACACGGATTTTAAGAATAATTCTTTC	Construction of complementation mutants
C_SPV_1393_FW	GAGTCACGTCTCCAATGTCTCAACTCTATGATATTACCA	Construction of SPV_1393::eryr complemented
C_SPV_1393_RV	GAGTCACGTCTCCGCTTATAAACTGGTAGAGTGTTTTGG	Construction of SPV_1393::eryr complemented
C_SPV_1393_ISU_RV	GAGTCACGTCTCGCATTATTTTTCCTCCTTATTTATTTAGATCTTAA	Construction of SPV_1393::eryr complemented
C_SPV_1393_ISD_FW	GAGTCACGTCTCGAAGCCGGATCCCTCCAGTAA	Construction of SPV_1393::eryr complemented
C_cPCR_spec_FW	CTATCGGGGAGAGTGTGATGATAAG	Colony PCR of complementation mutants
C_cPCR_spec_RV	TGCGTTTTCTTGTGGAGATATTTCC	Colony PCR of complementation mutants
C_cPCR_alg_FW	GCACCACCATATAGAAGGTTAGAAAC	Colony PCR of complementation mutants
C_cPCR_1393_RV	ATCTGATGAAACTGAAACCATTGACC	Construction of SPV_1044::eryr complemented
C_cPCR_1044_RV	CATATCTGAAACGGCTATTTCGTCC	Construction of SPV_1044::eryr complemented
F-os_CEP	TAAAACAAACCGCATCCG	Construction of luciferase reporter strain
CEP_PlacA_upR	CCTTGACGTCTCCtaCCGTGTTGATCACCGTCT	Construction of luciferase reporter strain
placA_F	CCTTGACGTCTCGGGTAGAAGCCAATCAGGTTGAA	Construction of luciferase reporter strain
placA_R	GATGGCGTCTCGTCCTTTAATCCACAAGGTGGAAG	Construction of luciferase reporter strain
CEP_placA_downF	GATGGCGTCTCGAGGAGGAATAATGAGATCCG	Construction of luciferase reporter strain
P3-luc_R	ATTAGGCTCTTTGTCAACTG	Construction of luciferase reporter strain
